# Supplementary material for: When Is a Two-Stage Surgical Procedure Indicated in the Treatment of Pseudotumors of the Hip? A Retrospective Study of 21 Cases and a Review of the Literature
Source: MDPI journal article supplement (doi:10.3390/jcm13030815), 2024-01-31
Supplement: s1 [file s1]

Table S1. Published literature on management of pseudotumors of the hip.

| Authors                                | Study                  | N° patients | Age(mean)        | Time to revision                                    | Comorbidity                                      | Gender       | Byopsy pre | Tribology       | Symptoms                                               | Surgery                        | Complications                                    | Outcomes                                                   |
|----------------------------------------|------------------------|-------------|------------------|-----------------------------------------------------|--------------------------------------------------|--------------|------------|-----------------|--------------------------------------------------------|--------------------------------|--------------------------------------------------|------------------------------------------------------------|
| Pandit et al. (2008) <sup>49</sup>     | Retrospective study    | 17          | 53 (35 to 73)    | 12                                                  | N.R                                              | F            |            | MoM             | Pain dislocation nerve palsy                           | One stage                      | no                                               | Symptoms improved                                          |
| Maurer et al. (2011) <sup>33</sup>     | Case report            | 1           | 38               | 1                                                   | N.R                                              | F            |            | MoM             | N.R                                                    | One stage (CoC)                | N.R                                              | Complete Resolution symptoms after 20 months               |
| Parfitt et al.(2012) <sup>34</sup>     | Case report            | 1           | 64               | 1.4                                                 | N.R                                              | M            |            | MoM             | N.R                                                    | One stage (MoP)                | N.R                                              | Good functional                                            |
| Algarni et al.(2012) <sup>35</sup>     | Case report            | 1           | 54               | 5                                                   | N.R                                              | F            |            | MoM             | N.R                                                    | One stage (CoC)                | N.R                                              | Complete Resolution symptoms after 6 months, no recurrence |
| Memon et al.(2013) <sup>36</sup>       | Case report            | 1           | 54               | 5                                                   | N.R                                              | F            |            | MoM             | N.R                                                    | One stage (CoC)                | N.R                                              | Good function                                              |
| Kawakita et al.(2013) <sup>37</sup>    | Case report            | 1           | 69               | 1.2                                                 | N.R                                              | F            |            | MoM             | N.R                                                    | One stage (CoC)                | N.R                                              | Good function after 3 months                               |
| Almoussa et al. (2013) <sup>30</sup>   | Prospective study      | 20          | 61               | N.R                                                 | N.R                                              | 12F<br>8 M   |            | 13 MoM<br>3 MoP | N.R                                                    | 5 patients revision            | no                                               | instability Femoral nerve palsy slowly resolves            |
| Bisschop et al. (2013) <sup>51</sup>   | N.R                    | 40          | N.R              | N.R                                                 | N.R                                              | N.R          |            | N.R             | 11 Symptomatic<br>29 asymptomatic                      | N.R                            | N.R                                              | N.R                                                        |
| Nawabi et al. (2013) <sup>52</sup>     | N.R                    | 55          | N.R              | N.R                                                 | N.R                                              | N.R          |            | N.R             | 40 Symptomatic<br>15 asymptomatic                      | N.R                            | no                                               | N.R                                                        |
| Fu et al (2015) <sup>53</sup>          | Case report and review | 2           | 60 (1)<br>47 (2) | 20 (1)<br>28(2)                                     | Ankylosing spondylitis<br>Ankylosing spondylitis | M<br>M       |            | MoP<br>MoP      | yes                                                    | Swelling pain<br>Swelling pain | Emipelvic amputation<br>One stage (THA revision) | no                                                         |
| Zhai et al. (2015) <sup>54</sup>       | Retrospective study    | 8           | N.R              | 31.9(range 18-45)                                   | Hemophilia A(7)<br>B(1)                          | M            |            | N.R             | N.R                                                    | N.R                            | Pseudotumor excision and fixation                | 3 infection                                                |
| Abdel-Hamid et al.(2015) <sup>38</sup> | Case report            | 1           | 75               | 6                                                   | N.R                                              | F            |            | MoM             | N.R                                                    | One stage (CoP)                | N.R -                                            | Significant improvement of swelling after 9 months         |
| Hasegwa et al (2016) <sup>28</sup>     | Retrospective study    | 62          | 64               | 45.7 months symptomatic<br>49.7 months asymptomatic | N.R                                              | 49 F<br>13 M |            | MoM             | 16 Symptomatic (larger pseudotumor)<br>46 asymptomatic | N.R -                          | N.R                                              | N.R                                                        |
| Campbell et al. (2016) <sup>8</sup>    | Case report            | 1           | 57               | 9                                                   | N.R                                              | F            |            | CoC             | pain                                                   | One stage                      | no                                               | asymptomatic                                               |
| Cottino et al. (2017) <sup>17</sup>    | Case report            | 1           | 72               | 15                                                  | N.R<br>N.R                                       | F            |            | MoM             | Abdominal mass, pain                                   | Two stage                      | no                                               | Pain free                                                  |
| Blau et al. (2017) <sup>12</sup>       | Case report            | 1           | 69               | 7                                                   | N.R.                                             | F            |            | CoM             | Hip pain 8 elevated serum cobalt                       | N.R                            | no                                               | No recurrence decreased level cobalt chromium              |

N.R.: not reported, M: male; F: female; MoM: Metal on metal; MoP: Metal on Polyethylene; CoC: Ceramic on Ceramic; CoM: Ceramic on Metal; THA: total Hip Arthroplasty

| Authors                                  | Study                                              | N° patients | Age(mean)        | Time to revision  | Comorbidity                                              | Gender       | Tribology                         | Biopsy pre | Symptoms                                                                                                          | Surgery                                                                                      | Complications                                     | outcomes                                                                                                                         |
|------------------------------------------|----------------------------------------------------|-------------|------------------|-------------------|----------------------------------------------------------|--------------|-----------------------------------|------------|-------------------------------------------------------------------------------------------------------------------|----------------------------------------------------------------------------------------------|---------------------------------------------------|----------------------------------------------------------------------------------------------------------------------------------|
| Konan et al. (2017) <sup>55</sup>        | Comparative study, ultrasound in pseudotumor       | 71          | 56(34-38)        | N.R               | N.R                                                      | 24 F<br>47 M | MoM                               |            | 15 asyntomatics<br>8 syntomatics                                                                                  | 8 patients revision<br>THA syntomatic<br>pseudotumor                                         | N.R                                               | N.R                                                                                                                              |
| Sutphen et al. (2018) <sup>56</sup>      | Retrospective study                                | 70          | N.R              | N.R               | N.R                                                      | N.R          |                                   | N.R        | 31 Symptomatic<br>39 asymptomatic                                                                                 | N.R                                                                                          | N.R                                               | N.R                                                                                                                              |
| Smeekees et al. (2018) <sup>41</sup>     | Comparison study of three grading system with MRI  |             | N.R              | N.R               | N.R                                                      |              | MoM                               |            | 54 symptomatic<br>52 asymptomatic                                                                                 | N.R                                                                                          | N.R                                               | N.R                                                                                                                              |
| Gudda et al. (2018) <sup>29</sup>        | Case report                                        | 1           | 50               | 8                 | N.R                                                      | F            | CoM                               |            | pain                                                                                                              | One stage                                                                                    | no                                                | Good result<br>HHS pre op 58<br>post op 87                                                                                       |
| Persson et al. (2018) <sup>57</sup>      | Prospective study                                  | 13          | 66               | 6,7 (2-16)        | osteoarthritis                                           | 9 F<br>4 M   | MoP                               | yes        | Pain swelling,<br>mass                                                                                            | One stage<br>Excision<br>pseudotumor and<br>revision the<br>nodular femoral<br>head tocerami | N.R                                               | N.R                                                                                                                              |
| Caleb W. Grote et al (2018) <sup>1</sup> | Case presentation and literature review            | 1           | 58               | 4                 | F                                                        | MoM          | N.R                               |            | Compresion<br>external iliac<br>vaiin                                                                             | One stage<br>(revision THA)                                                                  | no                                                | Complete<br>Resolution<br>symptoms after 4 years                                                                                 |
| Hart et al. <sup>44</sup>                | Case series                                        | 34          | N.R              | 34                | N.R                                                      | N.R          | N.R                               |            | 17Symptomatic<br>17 asymptomatic                                                                                  | N.R                                                                                          | N.R                                               | N.R                                                                                                                              |
| Sagoo et al. (2020) <sup>45</sup>        | Case report                                        | 1           | 53               | 11                | HIV                                                      | M            | MoM                               |            | Severe Chronic<br>abdominal pain<br>syntomatic psoas<br>fluid collection<br>communicate<br>with MoM<br>prosthesis | One stage                                                                                    | No                                                | Minimal pain                                                                                                                     |
| Mossavaghi et al. (2021) <sup>58</sup>   | Case report                                        | 1           | 67               | 7                 | osteoarthritis                                           | M            | CoC                               |            | Aseptic<br>loosening pain                                                                                         | One stage                                                                                    | no                                                | HHS pre 45<br>post 67<br>Good<br>functional                                                                                      |
| Filer et al. (2021) <sup>10</sup>        | Case report                                        | 1           | 62               | 14                | N.R                                                      | F            | MoM                               |            | Haemorrhagic<br>pseudotumor                                                                                       | Revision Hip ( Cer-<br>Pol) no excision<br>pseudotumor                                       | no                                                | Regression of the<br>pseudotumor,<br>Resolution of<br>symptoms<br>no pain,<br>paresthesia and<br>neuralgia have<br>been resolved |
| Rodriguetz et al (2022) <sup>46</sup>    | Case report                                        | 1           | 71               | 13                | N.R                                                      | M            | Cer-Cer                           |            | Femoral nerve<br>compression                                                                                      | One stage                                                                                    | no                                                |                                                                                                                                  |
| Huang et al. (2022) <sup>48</sup>        | Case report                                        | 1           | 73               | 7                 | N.R                                                      | F            | Cer-Cer                           |            | pain                                                                                                              | One stage                                                                                    | dislocation                                       | HHS 90<br>asympmtomatic                                                                                                          |
| Present study                            | Retrospective study e<br>revision of<br>literature | 21          | 69 (range 50-82) | 9,86 (range 1-20) | DM, IPA, stoke,<br>arthritis , obesity,<br>dysplasia, .. | 13 F,<br>8 M | 11 MoP<br>7 MoM<br>2 CoC<br>1 CoP | yes        | Swelling, pain                                                                                                    | <b>10 one stage</b><br><b>10 two stage</b><br><b>1 excision only</b>                         | 5 maior ( 2 death) 3<br>deep infection<br>3 minor | <b>HHS pre 35</b><br><b>HHS post 75</b>                                                                                          |

N.R.: not reported, M: male; F: female; MoM: Metal on metal; MoP: Metal on Polyethylene; CoC: Ceramic on Ceramic; CoM: Ceramic on Metal; THA: total Hip Arthroplasty, HHS: Harry Hip Scores, DM: Diabetes Mellitus; IPA: Hypertension
